# Supplementary material for: Development of the Canadian Food Intake Screener to assess alignment of adults’ dietary intake with the 2019 Canada’s Food Guide healthy food choices recommendations
Source: bioRxiv or medRxiv preprint supplement (doi:10.1101/2022.12.19.22283569), 2022-12-20
Supplement: Supplementary file [file media-1.pdf]

**Development of the Canadian Food Intake Screener to assess alignment of adults' dietary intake with the healthy food choices recommendations**

Hutchinson JM, Williams TE, et al.

**Supplementary File S1. Advisors who provided input on the development of the Canadian Food Intake Screener**

- Meghan Day, British Columbia Ministry of Health
- Kevin Dodd, U.S. National Cancer Institute
- Patricia Guenther, University of Utah
- Jess Haines, University of Guelph
- Mahsa Jessri, University of British Columbia
- Mary L'Abbé, University of Toronto
- Benoît Lamarche, Université Laval
- Simone Lemieux, Université Laval
- Maria Laura Louzada, University of São Paulo
- Dana Lee Olstad, University of Calgary
- Rachel Prowse, Memorial University of Newfoundland
- Janis Randall Simpson, University of Guelph
- Jill Reedy, U.S. National Cancer Institute
- Hassan Vatanparast, University of Saskatchewan
- Jennifer Vena, Alberta Health Services
